# Supplementary material for: Tree size variation induced by stand age mainly regulates aboveground biomass across three major stands of temperate forests in South Korea
Source: Frontiers journal article supplement (doi:10.3389/ffgc.2023.1229661), 2023-07-17
Supplement: Table_1.xlsx [file Table_1.xlsx]

## Sheet: Sheet1
Table S2. Allometric equations for the estimation of the aboveground biomass (AGB) of the woody plant species recorded in this study. Scientific names follow The WFO Plant List (www.wfoplantlist.org). Allometric equations were obtained from the listed literatures.
Sources for functional traits and allometric equations:
1. Dong, L., Zhang, L., Li, F. 2015. Developing additive systems of biomass equations for nine hardwood species in Northeast China. Tree 29, 1149–1163.
2. He, H., Zhang, C., Zhao, X., Fousseni, F., Wang, J., Dai, H., Yang, S., Zuo, Q. 2018. Allometic biomass equations for 12 tree species in coniferous and broadleaved mixed forests, Northeastern China. PLoS ONE 13, e0186226.
3. Komiyama, A., Nakagawa, M., Kato, S. 2011. Common allometric relationships for estimating tree biomasses in cool temperate forests of Japan. J. Jpn. For. Soc. 93, 220–225.
4. Lim, J.H., Shin, J.H., Jin, G.Z., Chun, J.H., Oh, J.S. 2003. Forest stand structure, site characteristics and carbon budget of Gwangneung Natural Forest in Korea. Korean. J. Agric. Forest Meteoro. 5, 101–109.
5. Son, Y.M., Kim, R.H, Lee, K.H., Pyo, J.K., Kim, S.W., Hwang, J.S., Lee, S.J., Park, H. 2014. Carbon emission factors and biomass allometric equations by species in Korea. National Institute of Forest Science, Seoul.
6. Wang, C. 2006. Biomass allometric equations for 10 co-occurring tree species in Chinese temperate forests. Forest Ecol. Manage. 222, 9–16.
7. Kwak, Y.S., Hur, Y.K., Song, J.H., Hwangbo, J.K. 2004. Quantification of atmospheric purification capacity by afforestation impact assessement of Kwangyang steel works. RIST Rep. 18, 334–340.
8. Hwang, S.I., Park, S.H. 2011. A Comparative Study on Estimation Methodologies of Carbon Sequestration Amount by Vegetation for Environmental Impact Assessment on Development Projects. J. Environ. Impact Assess. 20(4), 477-487.
Family	Genus	Species		Allometric equation	Reference
Pinaceae	Abies	Abies holophylla Maxim.		AGB = 0.064699617×DBH2.608	6
Pinaceae	Abies	Abies koreana E.H.Wilson		AGB = 0.064699617×DBH2.608	6
Pinaceae	Abies	Abies nephrolepis (Trautv. ex Maxim.) Maxim.		AGB = 0.064699617×DBH2.608	6
Aceraceae	Acer	Acer barbinerve Maxim.		AGB = 2.288×ln(DBH)+2.8149×ln(DBH)+1.931×ln(DBH)+3.9443	7
Aceraceae	Acer	Acer buergerianum Miq.		AGB = 0.0202×DBH1.810+0.0111×DBH2.740+0.1156×DBH2.336	6
Aceraceae	Acer	Acer ukurunduense Trautv. & C.A.Mey.		AGB = 2.288×ln(DBH)+2.8149×ln(DBH)+1.931×ln(DBH)+3.9443	7
Aceraceae	Acer	Acer mandshuricum Maxim.		AGB = 0.0335×DBH1.606+0.0026×DBH3.323+0.1222×DBH2.310	2
Aceraceae	Acer	Acer palmatum Thunb.		AGB = 2.288×ln(DBH)+2.8149×ln(DBH)+1.931×ln(DBH)+3.9443	7
Aceraceae	Acer	Acer pictum Thunb. var. mono (Maxim.) Maxim. ex Franch.		AGB = 0.0202×DBH1.810+0.0111×DBH2.740+0.1156×DBH2.336	6
Aceraceae	Acer	Acer pseudosieboldianum (Pax) Kom.		AGB = 2.288×ln(DBH)+2.8149×ln(DBH)+1.931×ln(DBH)+3.9443	7
Aceraceae	Acer	Acer tataricum L. subsp. ginnala (Maxim.) Wesm.		AGB = 2.288×ln(DBH)+2.8149×ln(DBH)+1.931×ln(DBH)+3.9443	7
Aceraceae	Acer	Acer tegmentosum Maxim.		AGB = 2.288×ln(DBH)+2.8149×ln(DBH)+1.931×ln(DBH)+3.9443	7
Aceraceae	Acer	Acer triflorum Kom.		AGB = 0.0335×DBH1.606+0.0026×DBH3.323+0.1222×DBH2.310	2
Aceraceae	Acer	Acer komarovii Pojark.		AGB = 2.288×ln(DBH)+2.8149×ln(DBH)+1.931×ln(DBH)+3.9443	7
Lauraceae	Actinodaphne	Actinodaphne lancifolia (Blume) Meisn.		AGB = 0.1673×DBH2.393	4
Hippocastanaceae	Aesculus	Aesculus turbinata Blume		AGB = 0.1673×DBH2.393	4
Simaroubaceae	Ailanthus	Ailanthus altissima (Mill.) Swingle		AGB = 0.1673×DBH2.393	4
Alangiaceae	Alangium	Alangium platanifolium (Siebold & Zucc.) Harms var. trilobum (Miq.) Ohwi		AGB = 0.18×DBH1.9494	8
Fabaceae	Albizia	Albizia julibrissin Durazz.		AGB = 0.1673×DBH2.393	4
Betulaceae	Alnus	Alnus firma Siebold & Zucc.		AGB = 0.1673×DBH2.393	4
Betulaceae	Alnus	Alnus incana (L.) Moench subsp. hirsuta (Turcz. ex Spach) Á.Löve & D.Löve		AGB = 0.1673×DBH2.393	4
Betulaceae	Alnus	Alnus japonica (Thunb.) Steud.		AGB = 0.1673×DBH2.393	4
Betulaceae	Alnus	Alnus pendula Matsum.		AGB = 0.1673×DBH2.393	4
Ulmaceae	Aphananthe	Aphananthe aspera (Thunb.) Planch.		AGB = 0.1673×DBH2.393	4
Araliaceae	Aralia	Aralia elata (Miq.) Seem.		AGB = 0.18×DBH1.9494	8
Rosaceae	Aria	Aria alnifolia (Siebold & Zucc.) Decne.		AGB = 0.08381×DBH2.491	4
Rhamnaceae	Berchemia	Berchemia berchemiifolia (Makino) Koidz.		AGB = 0.1673×DBH2.393	4
Betulaceae	Betula	Betula costata Trautv.		AGB = 0.076×DBH2.503+0.023×DBH2.387+0.039×DBH1.688	3
Betulaceae	Betula	Betula davurica Pall.		AGB = 0.076×DBH2.503+0.023×DBH2.387+0.039×DBH1.688	5
Betulaceae	Betula	Betula ermanii Cham.		AGB = 0.076×DBH2.503+0.023×DBH2.387+0.039×DBH1.688	5
Betulaceae	Betula	Betula pendula Roth		AGB = 0.076×DBH2.503+0.023×DBH2.387+0.039×DBH1.688	5
Betulaceae	Betula	Betula schmidtii Regel		AGB = 0.076×DBH2.503+0.023×DBH2.387+0.039×DBH1.688	5
Moraceae	Broussonetia	Broussonetia × hanjiana M.Kim		AGB = 0.18×DBH1.9494	8
Moraceae	Broussonetia	Broussonetia papyrifera (L.) L'Hér. ex Vent.		AGB = 0.1673×DBH2.393	4
Buxaceae	Buxus	Buxus sinica (Rehder & E.H.Wilson) M.Cheng var. insularis (Nakai) M.Cheng		AGB = 0.034×DBH2.475+0.002×DBH3.738+0.036×DBH1.995	5
Theaceae	Camellia	Camellia japonica L.		AGB = 0.255×DBH2.001+0.005×DBH3.167+0.000007×DBH4.413	5
Betulaceae	Carpinus	Carpinus cordata Blume		AGB = 0.255×DBH2.001+0.005×DBH3.167+0.000007×DBH4.413	5
Betulaceae	Carpinus	Carpinus laxiflora (Siebold & Zucc.) Blume		AGB = 0.255×DBH2.001+0.005×DBH3.167+0.000007×DBH4.413	5
Betulaceae	Carpinus	Carpinus tschonoskii Maxim.		AGB = 0.255×DBH2.001+0.005×DBH3.167+0.000007×DBH4.413	5
Betulaceae	Carpinus	Carpinus turczaninovii Hance		AGB = 0.0003×DBH4.217+0.010×DBH3.006+0.261×DBH1.199	5
Fagaceae	Castanea	Castanea crenata Siebold & Zucc.		AGB = 0.223×DBH2.092+0.004×DBH3.050+0.009×DBH2.317	5
Fagaceae	Castanopsis	Castanopsis sieboldii (Makino) Hatus.		AGB = 0.1673×DBH2.393	4
Ulmaceae	Celtis	Celtis aurantiaca Nakai		AGB = 0.1673×DBH2.393	4
Ulmaceae	Celtis	Celtis biondii Pamp.		AGB = 0.1673×DBH2.393	4
Ulmaceae	Celtis	Celtis jessoensis Koidz.		AGB = 0.1673×DBH2.393	4
Ulmaceae	Celtis	Celtis koraiensis Nakai		AGB = 0.1673×DBH2.393	4
Ulmaceae	Celtis	Celtis sinensis Pers.		AGB = 0.086×DBH2.393	4
Cephalotaxaceae	Cephalotaxus	Cephalotaxus harringtonia (Knight ex J.Forbes) K.Koch		AGB = 0.165×DBH2.157+0.022×DBH2.277+0.136×DBH1.470	5
Cupressaceae	Chamaecyparis	Chamaecyparis obtusa (Siebold & Zucc.) Endl.		AGB = 0.1673×DBH2.393	4
Oleaceae	Chionanthus	Chionanthus retusus Lindl. & Paxton		AGB = 0.1673×DBH2.393	4
Lauraceae	Cinnamomum	Cinnamomum yabunikkei H.Ohba		AGB = 0.18×DBH1.9494	8
Verbenaceae	Clerodendrum	Clerodendrum trichotomum Thunb.		AGB = 0.1673×DBH2.393	4
Theaceae	Cleyera	Cleyera japonica Thunb.		AGB = 0.1673×DBH2.393	4
Cornaceae	Cornus	Cornus controversa Hemsl.		AGB = 0.1673×DBH2.393	4
Cornaceae	Cornus	Cornus kousa Bürger ex Hance		AGB = 0.1673×DBH2.393	4
Cornaceae	Cornus	Cornus macrophylla Wall.		AGB = 0.1673×DBH2.393	4
Cornaceae	Cornus	Cornus officinalis Siebold & Zucc.		AGB = 0.1673×DBH2.393	4
Cornaceae	Cornus	Cornus walteri Wangerin		AGB = 0.18×DBH1.9494	8
Hamamelidaceae	Corylopsis	Corylopsis coreana Uyeki		AGB = 0.18×DBH1.9494	8
Betulaceae	Corylus	Corylus heterophylla Fisch. ex Trautv.		AGB = 0.18×DBH1.9494	8
Betulaceae	Corylus	Corylus sieboldiana Blume var. mandshurica (Maxim.) C.K.Schneid.		AGB = 0.18×DBH1.9494	8
Betulaceae	Corylus	Corylus sieboldiana Blume		AGB = 0.1673×DBH2.393	4
Rosaceae	Crataegus	Crataegus pinnatifida Bunge		AGB = 0.042×DBH2.533+0.005×DBH2.503+0.330×DBH1.257	5
Flacourtiaceae	Xylosma	Xylosma japonica (Thunb.) A.Gray ex H.Ohashi		AGB = 0.1673×DBH2.393	4
Cupressaceae	Cryptomeria	Cryptomeria japonica (Thunb. ex L.f.) D.Don		AGB = 0.1673×DBH2.393	4
Moraceae	Cudrania	Cudrania tricuspidata (Carrière) Bureau ex Lavallée		AGB = 0.1673×DBH2.393	4
Daphniphyllaceae	Daphniphyllum	Daphniphyllum macropodum Miq.		AGB = 0.1673×DBH2.393	4
Araliaceae	Dendropanax	Dendropanax trifidus (Thunb.) Makino ex H.Hara		AGB = 0.1673×DBH2.393	4
Ebenaceae	Diospyros	Diospyros kaki Thunb.		AGB = 0.1673×DBH2.393	4
Ebenaceae	Diospyros	Diospyros lotus L.		AGB = 0.18×DBH1.9494	8
Hamamelidaceae	Distylium	Distylium racemosum Siebold & Zucc.		AGB = 0.1673×DBH2.393	4
Elaeagnaceae	Elaeagnus	Elaeagnus umbellata Thunb.		AGB = 0.18×DBH1.9494	8
Eucommiaceae	Eucommia	Eucommia ulmoides Oliv.		AGB = 0.1673×DBH2.393	4
Celastraceae	Euonymus	Euonymus alatus (Thunb.) Siebold		AGB = 0.18×DBH1.9494	8
Celastraceae	Euonymus	Euonymus hamiltonianus Wall.		AGB = 0.18×DBH1.9494	8
Celastraceae	Euonymus	Euonymus macropterus Rupr.		AGB = 0.18×DBH1.9494	8
Celastraceae	Euonymus	Euonymus oxyphyllus Miq.		AGB = 0.18×DBH1.9494	8
Celastraceae	Euonymus	Euonymus sachalinensis (F.Schmidt) Maxim.		AGB = 0.18×DBH1.9494	8
Theaceae	Eurya	Eurya japonica Thunb.		AGB = 0.18×DBH1.9494	8
Staphyleaceae	Euscaphis	Euscaphis japonica (Thunb.) Kanitz		AGB = 0.1673×DBH2.393	4
Rosaceae	Exochorda	Exochorda serratifolia S.Moore		AGB = 0.18×DBH1.9494	8
Fagaceae	Fagus	Fagus multinervis Nakai		AGB = 0.1673×DBH2.393	4
Moraceae	Ficus	Ficus erecta Thunb.		AGB = 0.004279×DBH2.315+0.000922×DBH3.481+0.100159×DBH2.443	1
Sterculiaceae	Firmiana	Firmiana simplex (L.) W.Wight		AGB = 0.004279×DBH2.315+0.000922×DBH3.481+0.100159×DBH2.443	1
Euphorbiaceae	Securinega	Securinega suffruticosa (Pall.) Rehder		AGB = 0.004279×DBH2.315+0.000922×DBH3.481+0.100159×DBH2.443	1
Oleaceae	Fraxinus	Fraxinus chiisanensis Nakai		AGB = 0.004279×DBH2.315+0.000922×DBH3.481+0.100159×DBH2.443	1
Oleaceae	Fraxinus	Fraxinus rhynchophylla Hance		AGB = 0.086×DBH2.393	4
Oleaceae	Fraxinus	Fraxinus mandshurica Rupr.		AGB = 0.1673×DBH2.393	4
Oleaceae	Fraxinus	Fraxinus sieboldiana Blume		AGB = 0.1673×DBH2.393	4
Ginkgoaceae	Ginkgo	Ginkgo biloba L.		AGB = 0.1673×DBH2.393	4
Fabaceae	Gleditsia	Gleditsia japonica Miq.		AGB = 0.1673×DBH2.393	4
Ulmaceae	Hemiptelea	Hemiptelea davidii (Hance) Planch.		AGB = 0.18×DBH1.9494	8
Rhamnaceae	Hovenia	Hovenia dulcis Thunb.		AGB = 0.18×DBH1.9494	8
Flacourtiaceae	Idesia	Idesia polycarpa Maxim.		AGB = 0.1673×DBH2.393	4
Aquifoliaceae	Ilex	Ilex cornuta Lindl. & Paxton		AGB = 0.1673×DBH2.393	4
Aquifoliaceae	Ilex	Ilex crenata Thunb.		AGB = 0.1673×DBH2.393	4
Aquifoliaceae	Ilex	Ilex integra Thunb.		AGB = 0.1673×DBH2.393	4
Aquifoliaceae	Ilex	Ilex macropoda Miq.		AGB = 0.1673×DBH2.393	4
Aquifoliaceae	Ilex	Ilex rotunda Thunb.		AGB = 0.086×DBH2.393	4
Juglandaceae	Juglans	Juglans mandshurica Maxim.		AGB = 0.017×DBH1.948+0.008×DBH2.934+0.075×DBH2.408	6
Juglandaceae	Juglans	Juglans regia L.		AGB = 0.1673×DBH2.393	4
Cupressaceae	Juniperus	Juniperus rigida Siebold & Zucc.		AGB = 0.016×DBH2.888+0.005×DBH2.774+0.215×DBH1.864	5
Araliaceae	Kalopanax	Kalopanax septemlobus (Thunb.) Koidz.		AGB = 0.18×DBH1.9494	8
Lythraceae	Lagerstroemia	Lagerstroemia indica L.		AGB = 0.1673×DBH2.393	4
Pinaceae	Larix	Larix kaempferi (Lamb.) Carrière		AGB = 0.18×DBH1.9494	8
Oleaceae	Ligustrum	Ligustrum japonicum Thunb.		AGB = 0.18×DBH1.9494	8
Oleaceae	Ligustrum	Ligustrum lucidum W.T.Aiton		AGB = 0.1673×DBH2.393	4
Oleaceae	Ligustrum	Ligustrum obtusifolium Siebold & Zucc.		AGB = 0.18×DBH1.9494	8
Oleaceae	Ligustrum	Ligustrum ovalifolium Hassk.		AGB = 0.18×DBH1.9494	8
Oleaceae	Ligustrum	Ligustrum quihoui Carrière var. latifolium Nakai		AGB = 0.121×DBH2.288+0.020×DBH2.228+0.090×DBH1.263	5
Lauraceae	Lindera	Lindera erythrocarpa Makino		AGB = 0.18×DBH1.9494	8
Lauraceae	Lindera	Lindera glauca (Siebold & Zucc.) Blume		AGB = 0.0149×DBH1.700+0.0050×DBH3.055+0.1370×DBH2.198	2
Lauraceae	Lindera	Lindera obtusiloba Blume		AGB = 0.0149×DBH1.700+0.0050×DBH3.055+0.1370×DBH2.198	2
Magnoliaceae	Liriodendron	Liriodendron tulipifera L.		AGB = 0.1610646×DBH2.2080	8
Caprifoliaceae	Lonicera	Lonicera maackii (Rupr.) Maxim.		AGB = 0.1610646×DBH2.2080	8
Fabaceae	Maackia	Maackia amurensis Rupr.		AGB = 0.1673×DBH2.393	4
Fabaceae	Maackia	Maackia fauriei (H.Lév.) Takeda		AGB = 0.1673×DBH2.393	4
Lauraceae	Machilus	Machilus japonica Siebold & Zucc		AGB = 0.1673×DBH2.393	4
Lauraceae	Machilus	Machilus thunbergii Siebold & Zucc		AGB = 0.1673×DBH2.393	4
Magnoliaceae	Magnolia	Magnolia kobus DC.		AGB = 0.1673×DBH2.393	4
Magnoliaceae	Magnolia	Magnolia obovata Thunb.		AGB = 0.1673×DBH2.393	4
Magnoliaceae	Magnolia	Magnolia sieboldii K.Koch		AGB = 0.1673×DBH2.393	4
Euphorbiaceae	Mallotus	Mallotus japonicus (L.f.) Müll.Arg.		AGB = 0.1673×DBH2.393	4
Rosaceae	Malus	Malus baccata (L.) Borkh.		AGB = 0.1673×DBH2.393	4
Rosaceae	Malus	Malus toringo (Siebold) Siebold ex de Vriese		AGB = 0.1673×DBH2.393	4
Meliaceae	Melia	Melia azedarach L.		AGB = 0.1673×DBH2.393	4
Sabiaceae	Meliosma	Meliosma myriantha Siebold & Zucc.		AGB = 0.1673×DBH2.393	4
Sabiaceae	Meliosma	Meliosma pinnata (Roxb.) Maxim. var. oldhamii (Miq. ex Maxim.) Beusekom		AGB = 0.2768854×DBH2.0706	8
Moraceae	Morus	Morus alba L.		AGB = 0.2768854×DBH2.0706	8
Moraceae	Morus	Morus bombycis Koidz.		AGB = 0.1673×DBH2.393	4
Moraceae	Morus	Morus cathayana Hemsl.		AGB = 0.1673×DBH2.393	4
Lauraceae	Neolitsea	Neolitsea aciculata (Blume) Koidz.		AGB = 0.1673×DBH2.393	4
Lauraceae	Neolitsea	Neolitsea sericea (Blume) Koidz.		AGB = 0.087498×DBH2.332	8
Euphorbiaceae	Neoshirakia	Neoshirakia japonica (Siebold & Zucc.) Esser		AGB = 0.18×DBH1.9494	8
Betulaceae	Ostrya	Ostrya japonica Sarg.		AGB = 0.086×DBH2.393	4
Scrophulariaceae	Paulownia	Paulownia coreana Uyeki		AGB = 0.1673×DBH2.393	4
Rutaceae	Phellodendron	Phellodendron amurense Rupr.		AGB = 0.209×DBH2.087+0.069×DBH1.995+0.100×DBH1.635	5
Hydrangeaceae	Philadelphus	Philadelphus schrenkii Rupr.		AGB = 0.064×DBH2.377+0.621×DBH1.395+0.025×DBH2.237	5
Hydrangeaceae	Philadelphus	Philadelphus tenuifolius Rupr. & Maxim.		AGB = 0.220×DBH2.116+0.004×DBH2.814+0.035×DBH1.743	5
Rosaceae	Pourthiaea	Pourthiaea villosa (Thunb.) Decne.		AGB = 0.064×DBH2.377+0.621×DBH1.395+0.025×DBH2.237	5
Pinaceae	Picea	Picea jezoensis (Siebold & Zucc.) Carrière		AGB = 0.081×DBH2.455+0.028×DBH2.327+0.094×DBH1.658	5
Simaroubaceae	Picrasma	Picrasma quassioides (D.Don) Benn.		AGB = 0.1673×DBH2.393	4
Pinaceae	Pinus	Pinus densiflora Siebold & Zucc.		AGB = 0.078×DBH2.409+0.00004×DBH4.237+0.0008×DBH2.647	5
Pinaceae	Pinus	Pinus koraiensis Siebold & Zucc.		AGB = 0.078×DBH2.409+0.00004×DBH4.237+0.0008×DBH2.647	5
Pinaceae	Pinus	Pinus rigida Mill.		AGB = 0.078×DBH2.409+0.00004×DBH4.237+0.0008×DBH2.647	5
Pinaceae	Pinus	Pinus strobus L.		AGB = 0.18×DBH1.9494	8
Pinaceae	Pinus	Pinus thunbergii Parl.		AGB = 0.453152×DBH1.819	8
Platanaceae	Platanus	Platanus occidentalis L.		AGB = 0.453152×DBH1.819	8
Juglandaceae	Platycarya	Platycarya strobilacea Siebold & Zucc.		AGB = 0.453152×DBH1.819	8
Cupressaceae	Platycladus	Platycladus orientalis (L.) Franco		AGB = 0.04964×DBH2.471	8
Salicaceae	Populus	Populus suaveolens Fisch. ex Poit. & A.Vilm.		AGB = 0.453152×DBH1.819	8
Salicaceae	Populus	Populus × tomentiglandulosa T.B.Lee		AGB = 0.04964×DBH2.471	8
Salicaceae	Populus	Populus tremula L. var. davidiana (Dode) C.K.Schneid.		AGB = 0.453152×DBH1.819	8
Rosaceae	Prunus	Prunus armeniaca L.		AGB = 0.453152×DBH1.819	8
Rosaceae	Prunus	Prunus buergeriana Miq.		AGB = 0.04964×DBH2.471	8
Rosaceae	Prunus	Prunus davidiana (Carrière) Franch.		AGB = 0.453152×DBH1.819	8
Rosaceae	Prunus	Prunus maackii Rupr.		AGB = 0.453152×DBH1.819	8
Rosaceae	Prunus	Prunus mandshurica (Maxim.) Koehne		AGB = 0.453152×DBH1.819	8
Rosaceae	Prunus	Prunus maximowiczii Rupr.		AGB = 0.453152×DBH1.819	8
Rosaceae	Prunus	Prunus padus L.		AGB = 0.453152×DBH1.819	8
Rosaceae	Prunus	Prunus persica (L.) Batsch		AGB = 0.18×DBH1.9494	8
Rosaceae	Prunus	Prunus serrulata Lindl. var. pubescens (Makino) Nakai		AGB = 0.1673×DBH2.393	4
Rosaceae	Prunus	Prunus sargentii Rehder		AGB = 0.1673×DBH2.393	4
Rosaceae	Prunus	Prunus serrulata Lindl. f. spontanea (E.H.Wilson) Chin S.Chang		AGB = 0.533×DBH1.877+0.007×DBH3.130+0.006×DBH2.492	5
Rosaceae	Prunus	Prunus spachiana (Lavallée ex Ed.Otto) Kitam. f. ascendens (Makino) Kitam.		AGB = 0.051×DBH2.724+0.012×DBH2.854+0.006×DBH2.478	5
Rosaceae	Prunus	Prunus sargentii Rehder var. verecunda (Koidz.) Chin S.Chang		AGB = 0.595×DBH1.766+0.007×DBH2.970+0.005×DBH2.362	5
Rosaceae	Prunus	Prunus × yedoensis Matsum.		AGB = 0.595×DBH1.766+0.007×DBH2.970+0.005×DBH2.362	5
Rosaceae	Pyrus	Pyrus calleryana Decne. var. fauriei (C.K.Schneid.) Rehder		AGB = 0.533×DBH1.877+0.007×DBH3.130+0.006×DBH2.492	5
Rosaceae	Pyrus	Pyrus pyrifolia (Burm.f.) Nakai		AGB = 0.021×DBH2.763+0.072×DBH2.368+0.071×DBH1.776	5
Rosaceae	Pyrus	Pyrus ussuriensis Maxim. ex Rupr.		AGB = 0.595×DBH1.766+0.007×DBH2.970+0.005×DBH2.362	5
Fagaceae	Quercus	Quercus acuta Thunb.		AGB = 0.533×DBH1.877+0.007×DBH3.130+0.006×DBH2.492	5
Fagaceae	Quercus	Quercus acutissima Carruth.		AGB = 0.177×DBH2.195+0.003×DBH3.265+0.002×DBH2.713	5
Fagaceae	Quercus	Quercus aliena Blume		AGB = 0.186×DBH2.184+0.035×DBH2.293+0.061×DBH1.454	5
Fagaceae	Quercus	Quercus dentata Thunb.		AGB = 0.1673×DBH2.393	4
Fagaceae	Quercus	Quercus gilva Blume		AGB = 0.1673×DBH2.393	4
Fagaceae	Quercus	Quercus glauca Thunb.		AGB = 0.18×DBH1.9494	8
Fagaceae	Quercus	Quercus mongolica Fisch. ex Ledeb.		AGB = 0.18×DBH1.9494	8
Fagaceae	Quercus	Quercus salicina Blume		AGB = 0.18×DBH1.9494	8
Fagaceae	Quercus	Quercus serrata Murray		AGB = 0.18×DBH1.9494	8
Fagaceae	Quercus	Quercus variabilis Blume		AGB = 0.18×DBH1.9494	8
Rhamnaceae	Rhamnella	Rhamnella franguloides (Maxim.) Weberb.		AGB = 0.18×DBH1.9494	8
Rhamnaceae	Rhamnus	Rhamnus davurica Pall.		AGB = 0.18×DBH1.9494	8
Rhamnaceae	Rhamnus	Rhamnus yoshinoi Makino		AGB = 0.1673×DBH2.393	4
Rosaceae	Rhaphiolepis	Rhaphiolepis indica (L.) Lindl. ex Ker var. umbellata (Thunb. ex Murray) H.Ohashi		AGB = 0.173×DBH2.178+0.041×DBH2.358+0.027×DBH2.040	5
Ericaceae	Rhododendron	Rhododendron brachycarpum D.Don ex G.Don		AGB = 0.068×DBH2.837	8
Ericaceae	Rhododendron	Rhododendron mucronulatum Turcz.		AGB = 0.086804×DBH2.4561	8
Ericaceae	Rhododendron	Rhododendron schlippenbachii Maxim.		AGB = 0.068×DBH2.837	8
Ericaceae	Rhododendron	Rhododendron weyrichii Maxim.		AGB = 0.086804×DBH2.4561	8
Ericaceae	Rhododendron	Rhododendron yedoense Maxim. f. poukhanense (H.Lév.) Sugim. ex T.Yamaz.		AGB = 0.18×DBH1.9494	8
Anacardiaceae	Rhus	Rhus chinensis Mill.		AGB = 0.18×DBH1.9494	8
Fabaceae	Robinia	Robinia pseudoacacia L.		AGB = 0.18×DBH1.9494	8
Salicaceae	Salix	Salix caprea L.		AGB = 0.08381×DBH2.491	4
Salicaceae	Salix	Salix chaenomeloides Kimura		AGB = 0.18×DBH1.9494	8
Salicaceae	Salix	Salix hallaisanensis H.Lév.		AGB = 0.1673×DBH2.393	4
Salicaceae	Salix	Salix pierotii Miq.		AGB = 0.1673×DBH2.393	4
Caprifoliaceae	Sambucus	Sambucus racemosa L. subsp. kamtschatica (E.Wolf) Hultén		AGB = 0.1673×DBH2.393	4
Caprifoliaceae	Sambucus	Sambucus racemosa L. subsp. sieboldiana (Blume ex Miq.) H.Hara		AGB = 0.18×DBH1.9494	8
Caprifoliaceae	Sambucus	Sambucus williamsii Hance		AGB = 0.18×DBH1.9494	8
Rosaceae	Sorbaria	Sorbaria sorbifolia (L.) A.Braun var. stellipila Maxim.		AGB = 0.18×DBH1.9494	8
Rosaceae	Sorbus	Sorbus commixta Hedl.		AGB = 0.1673×DBH2.393	4
Staphyleaceae	Staphylea	Staphylea bumalda DC.		AGB = 0.1673×DBH2.393	4
Theaceae	Stewartia	Stewartia koreana Nakai ex Rehder		AGB = 0.086×DBH2.393	4
Styracaceae	Styrax	Styrax japonicus Siebold & Zucc.		AGB = 0.1673×DBH2.393	4
Styracaceae	Styrax	Styrax obassia Siebold & Zucc.		AGB = 0.0027×DBH2.368+0.0021×DBH3.131+0.0965×DBH2.323	2
Symplocaceae	Symplocos	Symplocos coreana (H.Lév.) Ohwi		AGB = 0.0027×DBH2.368+0.0021×DBH3.131+0.0965×DBH2.323	2
Symplocaceae	Symplocos	Symplocos sawafutagi Nagam.		AGB = 0.0027×DBH2.368+0.0021×DBH3.131+0.0965×DBH2.323	2
Symplocaceae	Symplocos	Symplocos tanakana Nakai		AGB = 0.1673×DBH2.393	4
Oleaceae	Syringa	Syringa reticulata (Blume) H.Hara		AGB = 0.086×DBH2.393	4
Oleaceae	Syringa	Syringa villosa Vahl subsp. wolfii (C.K.Schneid.) Y.Chen & D.Y.Hong		AGB = 0.1673×DBH2.393	4
Taxaceae	Taxus	Taxus cuspidata Siebold & Zucc.		AGB = 0.1673×DBH2.393	4
Rutaceae	Tetradium	Tetradium daniellii (Benn.) T.G.Hartley		AGB = 0.1673×DBH2.393	4
Cupressaceae	Thuja	Thuja koraiensis Nakai		AGB = 0.1673×DBH2.393	4
Tiliaceae	Tilia	Tilia amurensis Rupr.		AGB = 0.0044×DBH2.438+0.0068×DBH3.001+0.1308×DBH2.271	2
Tiliaceae	Tilia	Tilia mandshurica Rupr. & Maxim.		AGB = 0.0044×DBH2.438+0.0068×DBH3.001+0.1308×DBH2.271	2
Tiliaceae	Tilia	Tilia taquetii C.K.Schneid.		AGB = 0.0044×DBH2.438+0.0068×DBH3.001+0.1308×DBH2.271	2
Meliaceae	Toona	Toona sinensis (Juss.) M.Roem.		AGB = 0.0044×DBH2.438+0.0068×DBH3.001+0.1308×DBH2.271	2
Taxaceae	Torreya	Torreya nucifera (L.) Siebold & Zucc.		AGB = 0.0044×DBH2.438+0.0068×DBH3.001+0.1308×DBH2.271	2
Anacardiaceae	Toxicodendron	Toxicodendron succedaneum (L.) Kuntze		AGB = 0.18×DBH1.9494	8
Anacardiaceae	Toxicodendron	Toxicodendron sylvestre (Siebold & Zucc.) Kuntze		AGB = 0.18×DBH1.9494	8
Anacardiaceae	Toxicodendron	Toxicodendron trichocarpum (Miq.) Kuntze		AGB = 0.18×DBH1.9494	8
Anacardiaceae	Toxicodendron	Toxicodendron vernicifluum (Stokes) F.A.Barkley		AGB = 0.18×DBH1.9494	8
Ulmaceae	Ulmus	Ulmus davidiana Planch. ex DC.		AGB = 0.18×DBH1.9494	8
Ulmaceae	Ulmus	Ulmus davidiana Planch. ex DC. var. japonica (Rehder) Nakai		AGB = 0.1673×DBH2.393	4
Ulmaceae	Ulmus	Ulmus laciniata (Trautv.) Mayr		AGB = 0.18×DBH1.9494	8
Ulmaceae	Ulmus	Ulmus macrocarpa Hance		AGB = 0.18×DBH1.9494	8
Ulmaceae	Ulmus	Ulmus parvifolia Jacq.		AGB = 0.1673×DBH2.393	4
Ericaceae	Vaccinium	Vaccinium oldhamii Miq.		AGB = 0.18×DBH1.9494	8
Caprifoliaceae	Viburnum	Viburnum furcatum Blume ex Maxim.		AGB = 0.18×DBH1.9494	8
Caprifoliaceae	Viburnum	Viburnum odoratissimum Ker Gawl. ex Rümpler var. awabuki (K.Koch) Zabel ex Rümpler		AGB = 0.18×DBH1.9494	8
Caprifoliaceae	Weigela	Weigela subsessilis (Nakai) L.H.Bailey		AGB = 0.18×DBH1.9494	8
Rutaceae	Zanthoxylum	Zanthoxylum ailanthoides Siebold & Zucc.		AGB = 0.1673×DBH2.393	4
Rutaceae	Zanthoxylum	Zanthoxylum piperitum (L.) DC.		AGB = 0.18×DBH1.9494	8
Rutaceae	Zanthoxylum	Zanthoxylum schinifolium Siebold & Zucc.		AGB = 0.18×DBH1.9494	8
Ulmaceae	Zelkova	Zelkova serrata (Thunb.) Makino		AGB = 0.1673×DBH2.393	4
